# Supplementary material
Source: Springer Nature journal article supplement (https://www.springermedizin.de/resource/supplementary/12883_2012_759_MOESM3_ESM.pdf/9456196)
Supplement: MOESM3 [file 9456196]

**Clinical Suspicion of Partial CRPS 1**

**Budapest Criteria**

+ / - (10-20 %)

**Doubtful Cases:**

- Three Phase Bone Scan  
( < 6 months )
- (Standard X Ray)

+  
(80-90 %)

+

-

**Therapeutic interventions**

- Physiotherapy
- Occupational Therapy
- Drugs
- Others...

**Further Investigations:**

- MRI
- Blood tests...
